# Supplementary material for: Deletion of the NR4A nuclear receptor NOR1 in hematopoietic stem cells reduces inflammation but not abdominal aortic aneurysm formation
Source: PubMed Central journal article supplement (PMC5648424; doi:10.1186/s12872-017-0701-4), 2017-10-18
Supplement: 12872_2017_701_MOESM2_ESM.pdf [file 12872_2017_701_MOESM2_ESM.pdf]

| Gene     | Sequence                              |
|----------|---------------------------------------|
| C2       | -2520 -2506<br>5'-acgAAAGGGCAatgc-3'  |
| C4a      | -1973 -1959<br>5'-gaacAAGGTCActga-3'  |
| C8a      | -1323 -1309<br>5'-gagAAAGGTGAggtc-3'  |
| CCR7     | -2228 -2214<br>5'-tggAAAGGACAatggg-3' |
| CD40     | -1964 -1950<br>5'-gcttAAGGTCAatac-3'  |
| CSF3     | -705 -691<br>5'-aggcAAGGTCAggtg-3'    |
| Elk1     | -1693 -1679<br>5'-aaaAAAGGGCAaaat-3'  |
| Gnb1     | -629 -615<br>5'-tggAAAGGTCTcaga-3'    |
| IL23r    | -232 -218<br>5'-gtaAAAGGTCTcaat-3'    |
| Limk1    | -2682 -2668<br>5'-tctgAAGGTCAgaag-3'  |
| Mapkapk2 | -2682 -2668<br>5'-tccAAAGGACAaggc-3'  |
| Max      | -892 -878<br>5'-gctAGAGGTCAaacc-3'    |
| NFkb1    | -682 -668<br>5'-ctttAAGGTCActta-3'    |
| Nox1     | -2577 -2563<br>5'-ggaAAAGGTTAatgg-3'  |
| Rps6ka5  | -1635 -1621<br>5'-attAAAGGTCAgtgc-3'  |
| STAT1    | -2321 -2307<br>5'-aaggAAGGTCAtgct-3'  |
| Tgfb1    | -1056 -1042<br>5'-agaAAAGGACAaagg-3'  |
| Tlr1     | -675 -661<br>5'-gacAAAGGTGAcaga-3'    |

**Supplementary Table 2.** List of genes that were differentially regulated by NOR1 deletion and contain NGFI-B-responsive element (NBRE) binding sites in the 5' untranslated region (5'UTR). The NBRE consensus sequence consists of an octanucleotide AAAGGTCA motif and is labeled in capital letters in the Table. The numbers above the DNA sequences indicate the start and end position upstream of the translation start codons
