# Supplementary material for: Deletion of the NR4A nuclear receptor NOR1 in hematopoietic stem cells reduces inflammation but not abdominal aortic aneurysm formation
Source: Springer Nature journal article supplement (doi:10.1186/s12872-017-0701-4), 2017-10-18
Supplement: MOESM1 [file 15144972]

**Supplementary Table 1**

| Gene Name     | mean NOR1 <sup>+/+</sup> | mean NOR1 <sup>-/-</sup> | SEM NOR1 <sup>+/+</sup> | SEM NOR1 <sup>-/-</sup> | P                  |
|---------------|--------------------------|--------------------------|-------------------------|-------------------------|--------------------|
| Atf2          | 0.75602024               | 0.752796192              | 0.004990271             | 0.020296109             | 0.884877731        |
| Bcl6          | 1.40644687               | 1.50677788               | 0.110574049             | 0.073976821             | 0.492722532        |
| C1qa          | 1.053876417              | 1.039610265              | 0.145898863             | 0.114730957             | 0.942423992        |
| C1qb          | 1.305216344              | 1.194361595              | 0.089009182             | 0.059542276             | 0.359065489        |
| C1r           | 3.12229738               | 2.472212766              | 0.290342981             | 0.142485071             | 0.11479542         |
| C1s           | 2.570592485              | 1.444742914              | 0.509679815             | 0.147537813             | 0.101134004        |
| <b>C2*</b>    | <b>3.495408425</b>       | <b>6.386820017</b>       | <b>0.237859488</b>      | <b>0.327950446</b>      | <b>0.002038331</b> |
| C3            | 7.844954361              | 7.534259983              | 0.581445002             | 0.365390338             | 0.674410287        |
| C3ar1         | 1.361837068              | 1.231228413              | 0.03960316              | 0.029267376             | 0.05684717         |
| <b>C4a*</b>   | <b>5.325106523</b>       | <b>3.76178351</b>        | <b>0.133590065</b>      | <b>0.364891054</b>      | <b>0.015822355</b> |
| C6            | 2.497287777              | 1.475304195              | 0.749246451             | 0.409128345             | 0.297339876        |
| <b>C7*</b>    | <b>2.218996082</b>       | <b>0.731505276</b>       | <b>0.331266201</b>      | <b>0.146448225</b>      | <b>0.0147696</b>   |
| <b>C8a*</b>   | <b>3.259487261</b>       | <b>1.968128181</b>       | <b>0.41806256</b>       | <b>0.143051858</b>      | <b>0.043133279</b> |
| C8b           | 1.330948556              | 1.609904045              | 0.13595123              | 0.078428121             | 0.150149418        |
| C9            | 1.622683977              | 2.382750723              | 0.280600312             | 0.441652051             | 0.219990455        |
| Ccl11         | 1.182567411              | 1.303241805              | 0.478752276             | 0.334754808             | 0.846433724        |
| Ccl17         | 1.256819825              | 1.149626698              | 0.284321295             | 0.336463764             | 0.81971176         |
| <b>Ccl19*</b> | <b>3.672759192</b>       | <b>1.312437917</b>       | <b>0.578603382</b>      | <b>0.334181397</b>      | <b>0.024176393</b> |
| Ccl2          | 26.27597562              | 25.74132088              | 1.519954714             | 1.318100552             | 0.803567273        |
| Ccl21b        | 1.051424478              | 0.622499452              | 0.08398941              | 0.248860959             | 0.177794798        |
| Ccl22         | 1.024219858              | 1.353660461              | 0.29342226              | 0.195427567             | 0.402967668        |
| <b>Ccl24*</b> | <b>2.202653166</b>       | <b>1.536600619</b>       | <b>0.140994146</b>      | <b>0.119214142</b>      | <b>0.022610132</b> |
| <b>Ccl3*</b>  | <b>12.15571645</b>       | <b>10.06982304</b>       | <b>0.244693052</b>      | <b>0.299357413</b>      | <b>0.005711422</b> |
| Ccl4          | 16.21295974              | 13.53103184              | 1.018665254             | 0.513398993             | 0.078423666        |
| Ccl5          | 1223.7018                | 1188.68043               | 42.38619105             | 31.46330779             | 0.543331856        |
| Ccl7          | 61.09449467              | 63.86456686              | 4.419659834             | 5.582674292             | 0.717072478        |
| Ccl8          | 34.43762421              | 26.33014127              | 5.338840752             | 3.301634956             | 0.266085974        |
| Ccr1          | 1.399134919              | 1.265176769              | 0.04312115              | 0.314805672             | 0.694994435        |
| Ccr2          | 0.557959631              | 0.635080528              | 0.090510837             | 0.078840266             | 0.555525854        |
| Ccr3          | 4.894669178              | 3.761901171              | 0.412124846             | 0.358716788             | 0.106836606        |
| Ccr4          | 1.21719864               | 1.696997613              | 0.240819015             | 0.126159444             | 0.152352177        |
| <b>Ccr7*</b>  | <b>4.238661103</b>       | <b>2.187498067</b>       | <b>0.320864111</b>      | <b>0.308474544</b>      | <b>0.009967927</b> |
| Cd4           | 0.84813218               | 0.914249653              | 0.108757441             | 0.126163309             | 0.711681815        |
| <b>Cd40*</b>  | <b>55.18932265</b>       | <b>49.86945233</b>       | <b>0.943798775</b>      | <b>1.480176771</b>      | <b>0.03876338</b>  |
| Cd40lg        | 0.861688617              | 1.629871128              | 0.156142754             | 0.381895809             | 0.136103179        |
| <b>Cd55*</b>  | <b>0.86356158</b>        | <b>0.752296227</b>       | <b>0.019491094</b>      | <b>0.0032587</b>        | <b>0.004895263</b> |

| Gene Name     | mean NOR1 <sup>+/+</sup> | mean NOR1 <sup>-/-</sup> | SEM NOR1 <sup>+/+</sup> | SEM NOR1 <sup>-/-</sup> | P                  |
|---------------|--------------------------|--------------------------|-------------------------|-------------------------|--------------------|
| Cdc42         | 1.1300344                | 1.075436951              | 0.017681059             | 0.02498492              | 0.149031911        |
| Cebpb         | 3.057477259              | 2.874888833              | 0.167080921             | 0.157087299             | 0.470507016        |
| Cfb           | 10.07907922              | 9.158800411              | 0.616693063             | 0.481921698             | 0.304867195        |
| Cfd           | 0.826048162              | 0.905712984              | 0.18245277              | 0.241195353             | 0.805243357        |
| Cfl1          | 0.946533922              | 0.870266606              | 0.049680152             | 0.009122613             | 0.205576188        |
| Cltc          | 1.001346467              | 0.95550412               | 0.007892932             | 0.023532053             | 0.138476968        |
| Creb1         | 0.667563605              | 0.784686172              | 0.090679918             | 0.074566823             | 0.374921372        |
| Crp           | 3.555078646              | 2.062080353              | 0.785225336             | 0.557202493             | 0.195929757        |
| Csf1          | 28.75754777              | 28.72814073              | 0.766366727             | 2.082882303             | 0.990062847        |
| Csf2          | 3.791270907              | 3.603956468              | 0.133619439             | 0.534088937             | 0.750798766        |
| <b>Csf3*</b>  | <b>62.20234493</b>       | <b>29.59749824</b>       | <b>5.880221848</b>      | <b>3.777010879</b>      | <b>0.009551552</b> |
| Cxcl1         | 21.21969218              | 16.77520573              | 2.756627732             | 1.705595022             | 0.242243603        |
| Cxcl10        | 477.1251569              | 546.026342               | 35.18469784             | 15.62264322             | 0.147989566        |
| <b>Cxcl2*</b> | <b>19.25545545</b>       | <b>11.04053347</b>       | <b>1.175353685</b>      | <b>0.75379881</b>       | <b>0.004171786</b> |
| <b>Cxcl3*</b> | <b>2.860182926</b>       | <b>1.826170327</b>       | <b>0.088401632</b>      | <b>0.197369983</b>      | <b>0.008767377</b> |
| Cxcl5         | 3.176050182              | 2.634081178              | 0.260230381             | 0.523987219             | 0.406688752        |
| Cxcl9         | 528.4479734              | 613.6034756              | 93.53346266             | 74.74627354             | 0.516222239        |
| Cxcr4         | 0.049156655              | 0.065073918              | 0.001365641             | 0.01043533              | 0.204968294        |
| Daxx          | 9.355024124              | 9.297825364              | 0.530461218             | 0.169538343             | 0.923136272        |
| <b>Ddit3*</b> | <b>1.19957163</b>        | <b>1.035589396</b>       | <b>0.029638201</b>      | <b>0.011277432</b>      | <b>0.00664691</b>  |
| <b>Elk1*</b>  | <b>1.630169142</b>       | <b>1.161738297</b>       | <b>0.121991272</b>      | <b>0.073666886</b>      | <b>0.030299685</b> |
| Fasl          | 2.290535306              | 1.572526027              | 0.345698365             | 0.177585877             | 0.138394127        |
| Fos           | 0.929913906              | 1.060797646              | 0.044067818             | 0.092995587             | 0.272342561        |
| Fxyd2         | 0.506373715              | 0.429099903              | 0.037553871             | 0.037664501             | 0.219918756        |
| Gapdh         | 1.088359581              | 1.045364056              | 0.028231433             | 0.042262864             | 0.445216214        |
| Gnaq          | 0.551203319              | 0.502671044              | 0.017596157             | 0.010843475             | 0.078680571        |
| Gnas          | 0.856294097              | 0.813967893              | 0.023049458             | 0.015983452             | 0.205798218        |
| <b>Gnb1*</b>  | <b>1.171083729</b>       | <b>1.096442154</b>       | <b>0.004448484</b>      | <b>0.009677233</b>      | <b>0.002182621</b> |
| Gngt1         | 2.616751586              | 1.504231327              | 0.430781767             | 0.309105655             | 0.103855209        |
| Grb2          | 0.963090555              | 0.920928291              | 0.026870454             | 0.017660801             | 0.259983574        |
| <b>Gusb*</b>  | <b>0.55191977</b>        | <b>0.510093965</b>       | <b>0.011144623</b>      | <b>0.009794462</b>      | <b>0.047874995</b> |
| H2-Ea         | 2.276318035              | 1.454444387              | 0.279536941             | 0.154927177             | 0.061875341        |
| H2-Eb1        | 1.753461527              | 1.01476628               | 0.277408783             | 0.211612835             | 0.101665204        |
| Hc            | 1.043148444              | 1.602190573              | 0.146328093             | 0.154084636             | 0.058134276        |
| Hdac4         | 0.345569415              | 0.469436431              | 0.058508627             | 0.055464622             | 0.19924015         |
| Hmgn1         | 0.566416855              | 0.547655405              | 0.033622524             | 0.021357908             | 0.662173696        |
| Hprt1         | 0.688009521              | 0.684197219              | 0.023366594             | 0.023943118             | 0.91476684         |
| Hras1         | 0.794341735              | 1.054481315              | 0.043147417             | 0.088135274             | 0.056924413        |

| Gene Name     | mean NOR1 <sup>+/+</sup> | mean NOR1 <sup>-/-</sup> | SEM NOR1 <sup>+/+</sup> | SEM NOR1 <sup>-/-</sup> | P                  |
|---------------|--------------------------|--------------------------|-------------------------|-------------------------|--------------------|
| Hspb2         | 3.185327922              | 2.102946684              | 0.680676605             | 0.396608955             | 0.241424267        |
| Ifna1         | 1.925450062              | 1.490472815              | 0.181078042             | 0.142353647             | 0.131984742        |
| Ifnb1         | 6.073324881              | 5.547133363              | 1.162048873             | 0.253738557             | 0.681075142        |
| Ifng          | 0.892884168              | 0.900028823              | 0.024249585             | 0.20452523              | 0.973989098        |
| Il10          | 2.305266553              | 2.311210959              | 0.291904207             | 0.245278123             | 0.988307398        |
| Il10rb        | 1.122595193              | 1.079584412              | 0.048353208             | 0.032836543             | 0.502630497        |
| Il11          | 1.678442503              | 2.027831369              | 0.383371979             | 0.142424503             | 0.441080268        |
| <b>Il12a*</b> | <b>2.596390958</b>       | <b>1.427055788</b>       | <b>0.034776053</b>      | <b>0.134560997</b>      | <b>0.001092442</b> |
| Il12b         | 222.6170242              | 188.0131698              | 36.72193991             | 37.80978235             | 0.547336134        |
| Il13          | 1.030524433              | 1.392234974              | 0.141346293             | 0.272679077             | 0.304205509        |
| Il15          | 9.022684864              | 10.09817005              | 0.487781932             | 0.355774372             | 0.149447216        |
| Il18          | 11.26134577              | 11.35688643              | 0.688772332             | 0.876101846             | 0.935800571        |
| Il18rap       | 2.119155183              | 2.883156436              | 0.165312882             | 0.652659839             | 0.319863901        |
| Il1a          | 84.61801395              | 52.83385663              | 11.39285436             | 5.973758225             | 0.068889036        |
| Il1b          | 222.4241182              | 142.5910207              | 30.81908928             | 20.02884682             | 0.095595854        |
| <b>Il1r1*</b> | <b>1.280431369</b>       | <b>2.042523108</b>       | <b>0.04736756</b>       | <b>0.062030669</b>      | <b>0.000616306</b> |
| Il1rap        | 2.320855995              | 2.293527958              | 0.015537341             | 0.137557526             | 0.853131704        |
| Il1rn         | 41.01765235              | 41.43671564              | 5.331106656             | 4.805529642             | 0.956240661        |
| Il2           | 1.423308857              | 1.324617717              | 0.256943556             | 0.43767106              | 0.855294249        |
| Il22          | 1.615606496              | 1.306307426              | 0.327414392             | 0.231841959             | 0.483743453        |
| Il22ra2       | 1.86444858               | 1.358773146              | 0.278337039             | 0.272027997             | 0.263671036        |
| Il23a         | 1.593413755              | 1.494590609              | 0.699606894             | 0.703967571             | 0.925475042        |
| <b>Il23r*</b> | <b>25.14447995</b>       | <b>19.71381512</b>       | <b>0.783027841</b>      | <b>0.685403232</b>      | <b>0.006433482</b> |
| <b>Il3*</b>   | <b>4.739823904</b>       | <b>2.167244815</b>       | <b>0.169631571</b>      | <b>0.393285164</b>      | <b>0.003867463</b> |
| <b>Il4*</b>   | <b>1.356966569</b>       | <b>3.362544991</b>       | <b>0.287032439</b>      | <b>0.495255199</b>      | <b>0.024813363</b> |
| Il5           | 2.170630363              | 0.745549342              | 0.713220894             | 0.067026577             | 0.117541086        |
| <b>Il6*</b>   | <b>140.1146014</b>       | <b>82.70517051</b>       | <b>7.777720247</b>      | <b>6.633369209</b>      | <b>0.004940434</b> |
| Il6ra         | 0.459831013              | 0.439126771              | 0.014922016             | 0.009226843             | 0.303341866        |
| Il7           | 5.029519426              | 4.706478606              | 0.407476242             | 0.522595921             | 0.651430841        |
| Il8ra         | 1.452085606              | 1.141820641              | 0.149651058             | 0.073742956             | 0.136443622        |
| Il8rb         | 1.149108948              | 1.409788587              | 0.232709709             | 0.13237553              | 0.385349343        |
| Il9           | 1.306363392              | 1.808068737              | 0.13336443              | 0.319053918             | 0.220446242        |
| Itgb2         | 0.781091989              | 0.752185161              | 0.024066374             | 0.045104288             | 0.601987481        |
| Jun           | 0.820540301              | 0.784037971              | 0.048675937             | 0.036530658             | 0.580971899        |
| Keap1         | 2.834939892              | 2.698105729              | 0.120460642             | 0.059611644             | 0.366206897        |
| Kng1          | 1.441330822              | 1.923995307              | 0.155590886             | 0.747282979             | 0.561511144        |
| <b>Limk1*</b> | <b>0.565354372</b>       | <b>0.666571545</b>       | <b>0.018547086</b>      | <b>0.011715106</b>      | <b>0.009926016</b> |
| Lta           | 5.33226709               | 6.285034286              | 0.541633105             | 0.462191303             | 0.251866684        |

| Gene Name | mean NOR1 <sup>+/+</sup> | mean NOR1 <sup>-/-</sup> | SEM NOR1 <sup>+/+</sup> | SEM NOR1 <sup>-/-</sup> | P           |
|-----------|--------------------------|--------------------------|-------------------------|-------------------------|-------------|
| Ly96      | 1.281155189              | 1.272989392              | 0.041617228             | 0.010818586             | 0.858634668 |
| Maff      | 6.271689928              | 7.149109686              | 0.168744325             | 0.980842137             | 0.427780628 |
| Mafg      | 0.683027562              | 0.777134728              | 0.024112564             | 0.026693593             | 0.059037792 |
| Mafk      | 3.144409461              | 3.124993569              | 0.158778237             | 0.088925956             | 0.920171825 |
| Map2k1    | 2.924712988              | 2.798289381              | 0.110482369             | 0.07254169              | 0.392971702 |
| Map2k4    | 1.701743949              | 1.569520539              | 0.053425717             | 0.09490953              | 0.291512909 |
| Map2k6    | 0.565245811              | 0.700136731              | 0.053693863             | 0.018239391             | 0.076094602 |
| Map3k1    | 0.519460141              | 0.56431099               | 0.016124717             | 0.014455176             | 0.107095269 |
| Map3k5    | 0.793824141              | 0.860660818              | 0.047967341             | 0.036186152             | 0.328329334 |
| Map3k7    | 0.835935262              | 0.804186104              | 0.00735092              | 0.012917169             | 0.099510169 |
| Map3k9    | 1.439372079              | 0.955853052              | 0.258229955             | 0.059812697             | 0.142191351 |
| Mapk1     | 0.78208656               | 0.804743892              | 0.007708349             | 0.007709966             | 0.106239418 |
| Mapk14    | 0.379609167              | 0.345215466              | 0.018500356             | 0.005334195             | 0.148587173 |
| Mapk3     | 0.677592821              | 0.66805157               | 0.015157234             | 0.020862241             | 0.730139603 |
| Mapk8     | 1.125180509              | 0.959064124              | 0.052386798             | 0.036478627             | 0.059907616 |
| Mapkapk2* | 3.471743018              | 3.264332789              | 0.030739339             | 0.036381993             | 0.012112618 |
| Mapkapk5  | 1.148480179              | 1.046103745              | 0.049648005             | 0.011377036             | 0.114805794 |
| Masp1     | 1.130445178              | 1.210199706              | 0.081021086             | 0.153696155             | 0.670045626 |
| Masp2     | 0.636334345              | 1.109378467              | 0.147018663             | 0.115189639             | 0.064475181 |
| Max*      | 2.324903187              | 2.117854763              | 0.035838309             | 0.052909319             | 0.031674918 |
| Mbl2      | 1.509580463              | 1.13286674               | 0.042215759             | 0.286492396             | 0.263181413 |
| Mef2a     | 0.471854096              | 0.488763747              | 0.029427898             | 0.029644827             | 0.706325128 |
| Mef2b     | 1.452748983              | 1.094164239              | 0.227300747             | 0.32848325              | 0.420105128 |
| Mef2c     | 0.256255104              | 0.282842969              | 0.021351688             | 0.008489323             | 0.311614035 |
| Mef2d     | 0.65663222               | 0.613973822              | 0.026900273             | 0.018497745             | 0.261384313 |
| Mknk1     | 0.700939183              | 0.748362675              | 0.011490629             | 0.015152481             | 0.067211284 |
| Myc       | 1.002085                 | 0.864174662              | 0.080747919             | 0.040465652             | 0.20149271  |
| Myd88     | 3.313269863              | 3.130998816              | 0.074525241             | 0.018938264             | 0.076785531 |
| Myl2      | 1.008197338              | 1.68176359               | 0.062836748             | 0.293833972             | 0.088459817 |
| Nfatc3    | 0.746585992              | 0.732099175              | 0.025925283             | 0.008146137             | 0.622210437 |
| Nfe2l2    | 1.419778971              | 1.321493713              | 0.021539726             | 0.049364336             | 0.142072768 |
| Nfkb1*    | 2.179133807              | 1.978733644              | 0.036817553             | 0.040030636             | 0.021116973 |
| Nos2      | 72.09795347              | 71.33800211              | 9.005173978             | 5.68865247              | 0.946546383 |
| Nox1*     | 1.299651733              | 1.137092179              | 0.042124672             | 0.016806611             | 0.023079529 |
| Nr3c1     | 1.273787081              | 1.193879164              | 0.013260471             | 0.03636942              | 0.10793796  |
| Pdgfa     | 0.911396215              | 0.989072741              | 0.039600387             | 0.123486258             | 0.581455927 |
| Pgk1      | 1.365962287              | 1.385405122              | 0.024803471             | 0.062179425             | 0.785919167 |
| Pik3c2g   | 0.980409056              | 0.766699854              | 0.074596455             | 0.137458056             | 0.243564227 |

| Gene Name | mean NOR1 <sup>+/+</sup> | mean NOR1 <sup>-/-</sup> | SEM NOR1 <sup>+/+</sup> | SEM NOR1 <sup>-/-</sup> | P           |
|-----------|--------------------------|--------------------------|-------------------------|-------------------------|-------------|
| Pla2g4a   | 2.631420005              | 2.676463728              | 0.023857455             | 0.137843509             | 0.763587394 |
| Plcb1     | 0.280936277              | 0.263425025              | 0.053328206             | 0.026125473             | 0.782755232 |
| Ppp1r12b  | 0.593763836              | 0.755605694              | 0.15570481              | 0.19583585              | 0.552962007 |
| Prkca     | 0.792389812              | 1.510122146              | 0.126390767             | 0.281434304             | 0.080566678 |
| Prkcb1    | 0.639904376              | 0.584179894              | 0.035928404             | 0.013048993             | 0.218633781 |
| Ptk2      | 2.151789944              | 2.072930906              | 0.051001886             | 0.025109114             | 0.237670213 |
| Rac1      | 0.95637635               | 0.923926357              | 0.010055345             | 0.021818383             | 0.248135946 |
| Raf1      | 0.964851184              | 0.934133851              | 0.02942749              | 0.02861551              | 0.495849348 |
| Rapgef2   | 9.906402855              | 9.386204413              | 0.345858006             | 0.133171892             | 0.233099837 |
| Rhoa      | 0.928446517              | 0.887409273              | 0.015325211             | 0.014826079             | 0.126607635 |
| Ripk1     | 0.81466039               | 0.802597214              | 0.017620653             | 0.011530066             | 0.597402669 |
| Ripk2     | 1.930913683              | 1.971753132              | 0.060316307             | 0.037273846             | 0.59548314  |
| Rock2     | 0.702276127              | 0.648468892              | 0.028403054             | 0.016229283             | 0.175347925 |
| Rps6ka5*  | 0.213878285              | 0.282680889              | 0.007045548             | 0.010106983             | 0.005042578 |
| Shc1      | 0.8208192                | 0.847203697              | 0.037592067             | 0.015863516             | 0.553095149 |
| Stat1*    | 10.97652536              | 12.45494401              | 0.158426077             | 0.317261049             | 0.014041919 |
| Tgfb1*    | 0.790631351              | 0.719324356              | 0.003391805             | 0.010142069             | 0.002628734 |
| Tgfb2     | 3.125758118              | 3.747699256              | 0.75402245              | 0.209318083             | 0.471236923 |
| Tgfb3     | 1.700132506              | 2.318151463              | 0.035553867             | 0.270190579             | 0.085936732 |
| Tgfbr1    | 0.446183114              | 0.421867538              | 0.016681927             | 0.029247401             | 0.510155679 |
| Tlr1*     | 1.744959469              | 1.483711552              | 0.056053887             | 0.067009509             | 0.040323426 |
| Tlr2*     | 0.807556485              | 0.725945301              | 0.012241502             | 0.020459552             | 0.026707009 |
| Tlr3      | 14.67023452              | 14.35064233              | 0.810326666             | 0.445386759             | 0.747031762 |
| Tlr4      | 1.119947745              | 1.158990306              | 0.124919787             | 0.07472527              | 0.801796948 |
| Tlr5      | 0.895186336              | 0.874378836              | 0.336213146             | 0.308986497             | 0.96583921  |
| Tlr6      | 1.587591458              | 1.630175127              | 0.053651515             | 0.066457862             | 0.644251763 |
| Tlr7      | 2.292058445              | 2.155721109              | 0.084339616             | 0.046989982             | 0.23076428  |
| Tnf*      | 8.355466146              | 7.492937558              | 0.073305398             | 0.069586952             | 0.00103484  |
| Tnfsf14*  | 0.965524914              | 0.448583387              | 0.063161513             | 0.14273086              | 0.029599162 |
| Tollip    | 1.181558303              | 1.152243634              | 0.0359171               | 0.035032366             | 0.590400501 |
| Tradd*    | 1.127688984              | 1.014333446              | 0.030403255             | 0.017446522             | 0.031860597 |
| Traf2     | 2.000929276              | 1.969779927              | 0.047364927             | 0.035146844             | 0.62535317  |
| Tubb5     | 0.635728393              | 0.639279325              | 0.013289209             | 0.01832079              | 0.8829309   |

**Supplementary Table 1.** Inflammatory gene expression in response to LPS treatment of bone marrow-derived macrophages using nCounter Gene Expression Assays. Macrophages were isolated from NOR1-deficient or wild-type mice (n=6 mice per group) and treated with 100 ng/ml LPS for 8 hours. RNA from two mice of the same strain was pooled and analyzed for transcript expression. After standard normalization to six house-

keeping genes, the LPS response was expressed as fold increase over basal transcript levels. Data are represented as mean and standard error of the mean (SEM). Significantly different gene expression between NOR1<sup>+/+</sup> and NOR1<sup>-/-</sup> cells is indicated in yellow (P<0.05).
